# Supplementary material for: High-Resolution Coproecology: Using Coprolites to Reconstruct the Habits and Habitats of New Zealand’s Extinct Upland Moa (Megalapteryx didinus)
Source: PubMed Central journal article supplement (PMC3386916; doi:10.1371/journal.pone.0040025), 2012-06-29

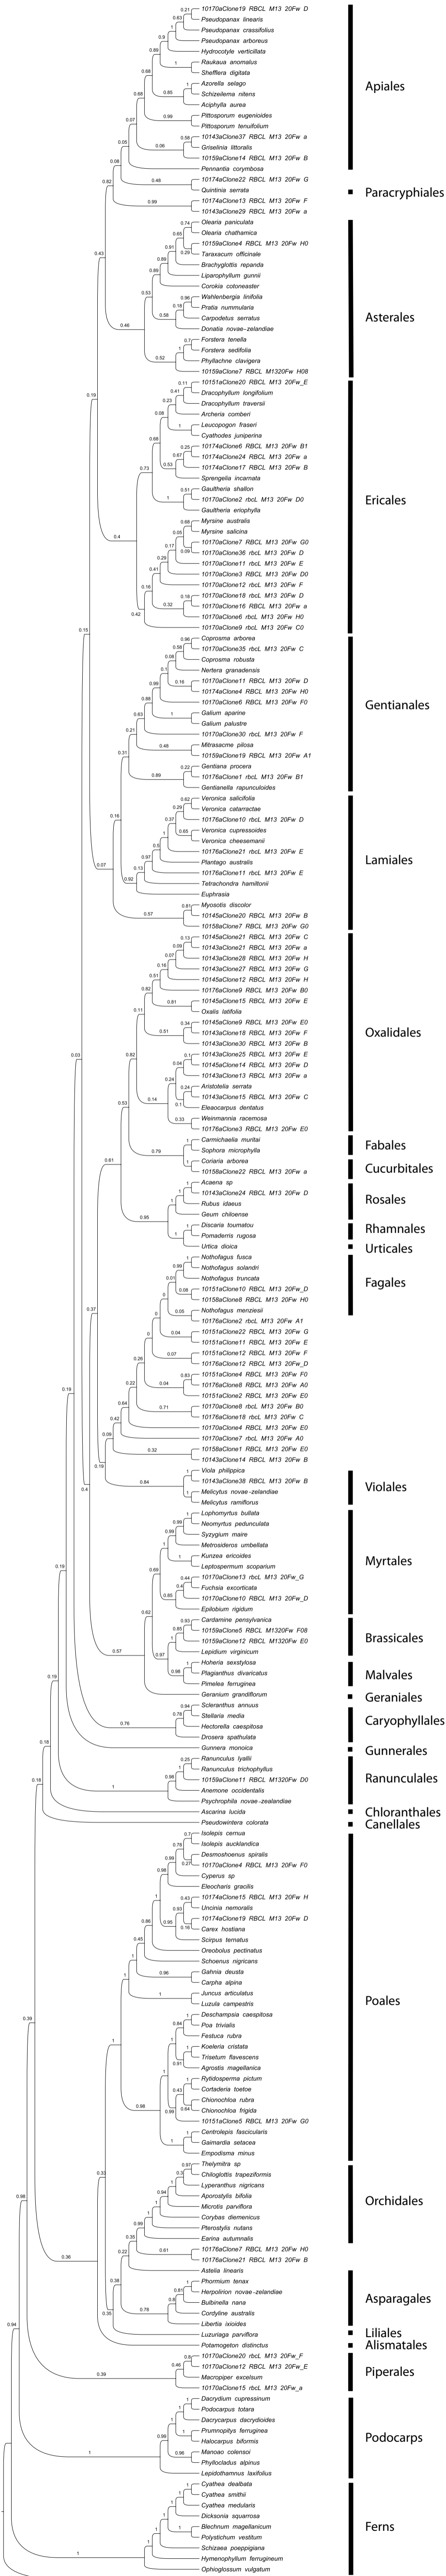

Supplement: pone.0040025.s005.pdf [file pone.0040025.s005.pdf]
